# Supplementary material
Source: publisher site journal article supplement (http://www.kjim.org/upload/media/kjim-2017-332-suppl2.pdf)
Supplement: Supplementary file 1 [file kjim-2017-332-suppl2.pdf]

**Supplementary Table 2. Annual consumption of antimicrobial agents for systemic use at general wards (unit: DDD/1,000 patient-days)**

|                                          | 2004   | 2005     | 2006     | 2007   | 2008   | 2009   | 2010   | 2011   | 2012   | 2013   | Total  | Coefficient for time | p value |
|------------------------------------------|--------|----------|----------|--------|--------|--------|--------|--------|--------|--------|--------|----------------------|---------|
| <b>Broad-spectrum antibiotics</b>        |        |          |          |        |        |        |        |        |        |        |        |                      |         |
| 3rd CEPs                                 | 159.43 | 189.06   | 182.35   | 172.33 | 163.33 | 169.68 | 165.28 | 152.68 | 157.73 | 155.50 | 167.40 | -0.216               | < 0.001 |
| 4th CEPs                                 | 6.98   | 5.98     | 1.67     | 7.14   | 12.73  | 10.95  | 20.33  | 20.04  | 19.54  | 26.79  | 12.65  | 0.204                | < 0.001 |
| BL/BLIs                                  | 67.60  | 63.66    | 66.23    | 59.20  | 67.49  | 71.95  | 61.90  | 79.30  | 81.43  | 93.39  | 70.56  | 0.214                | < 0.001 |
| FQs                                      | 126.29 | 119.88   | 136.46   | 118.20 | 114.66 | 114.73 | 105.27 | 121.24 | 118.71 | 123.48 | 120.01 | -0.081               | 0.033   |
| Subtotal                                 | 360.31 | 378.58   | 386.71   | 356.88 | 358.22 | 367.31 | 352.79 | 373.27 | 377.42 | 399.16 | 370.61 | 0.121                | 0.087   |
| <b>Antibiotics against MDR pathogens</b> |        |          |          |        |        |        |        |        |        |        |        |                      |         |
| Carbapenems                              | 0.27   | 4.28     | 11.30    | 8.19   | 5.48   | 6.29   | 9.31   | 7.64   | 8.61   | 11.72  | 7.17   | 0.063                | < 0.001 |
| Glycopeptides                            | 14.29  | 13.60    | 16.56    | 13.47  | 14.24  | 13.17  | 18.98  | 15.70  | 18.11  | 20.01  | 15.67  | 0.051                | < 0.001 |
| Oxazolidinone                            | 0.00   | 0.26     | 0.42     | 0.74   | 0.54   | 0.83   | 1.24   | 1.06   | 1.78   | 1.43   | 0.79   | 0.015                | < 0.001 |
| Polymyxin                                | 0.00   | 0.02     | 0        | 1.50   | 2.46   | 0.90   | 1.55   | 1.57   | 1.97   | 0.95   | 1.06   | 0.015                | < 0.001 |
| Tigecycline                              | 0      | 0        | 0        | 0      | 0      | 0.59   | 0.82   | 0.07   | 0.88   | 1.75   | 0.38   | 0.013                | < 0.001 |
| Subtotal                                 | 14.56  | 18.16    | 28.27    | 23.90  | 22.73  | 21.78  | 31.90  | 26.04  | 31.35  | 35.86  | 25.08  | 0.156                | < 0.001 |
| <b>Nonbroad-spectrum antibiotics</b>     |        |          |          |        |        |        |        |        |        |        |        |                      |         |
| 1st CEPs                                 | 158.75 | 135.87   | 152.60   | 188.96 | 154.32 | 143.39 | 138.82 | 136.49 | 132.43 | 114.06 | 146.62 | -0.350               | < 0.001 |
| 2nd CEPs                                 | 159.67 | 173.20   | 148.53   | 124.55 | 104.56 | 95.75  | 92.70  | 87.46  | 91.97  | 94.83  | 119.22 | -0.783               | < 0.001 |
| AGs                                      | 158.74 | 141.79   | 141.64   | 130.13 | 78.05  | 50.68  | 35.29  | 31.77  | 30.42  | 23.66  | 85.92  | -1.443               | < 0.001 |
| Lincosamides                             | 7.52   | 11.97    | 14.45    | 13.89  | 12.69  | 14.38  | 17.57  | 14.32  | 13.65  | 12.23  | 13.21  | 0.031                | 0.006   |
| Macrolides                               | 36.12  | 48.42    | 51.84    | 50.66  | 49.26  | 50.36  | 30.53  | 53.26  | 46.82  | 40.18  | 45.83  | -0.016               | 0.690   |
| Metronidazole                            | 40.70  | 46.57    | 50.56    | 48.42  | 47.63  | 40.98  | 39.22  | 38.60  | 39.10  | 34.41  | 42.95  | -0.101               | < 0.001 |
| Monobactam                               | 2.20   | 1.49     | 0.80     | 0.83   | 0.84   | 0.36   | 0      | 0      | 0      | 0      | 0.70   | -0.019               | < 0.001 |
| Penicillins                              | 21.79  | 21.41    | 15.19    | 16.85  | 11.50  | 7.76   | 15.36  | 19.64  | 22.91  | 21.02  | 17.23  | 0.011                | 0.575   |
| Tetracyclines                            | 6.53   | 9.90     | 6.52     | 4.85   | 3.88   | 0.03   | 0.40   | 0.75   | 5.34   | 6.76   | 4.58   | -0.036               | 0.002   |
| SXT                                      | 15.67  | 16.06    | 21.65    | 25.90  | 30.57  | 23.07  | 39.58  | 33.93  | 31.70  | 19.09  | 25.44  | 0.124                | < 0.001 |
| Subtotal                                 | 607.68 | 606.70   | 603.77   | 605.03 | 493.29 | 426.77 | 409.47 | 416.22 | 414.34 | 366.23 | 501.70 | -2.580               | < 0.001 |
| Total                                    | 982.55 | 1,003.44 | 1,018.75 | 985.80 | 874.23 | 815.86 | 794.15 | 815.52 | 823.11 | 801.25 | 897.39 | -2.304               | < 0.001 |

Coefficient for time and p value were extracted from a linear regression model using measures on a monthly basis.

DDD, defined daily dose; CEP, cephalosporin; BL, β-lactam; BLI, β-lactamase inhibitor; FQ, fluoroquinolone; MDR, multidrug-resistant; AG, aminoglycoside; SXT, trimethoprim/sulfamethoxazole.
